# Supplementary material
Source: PubMed Central journal article supplement (PMC6112742)
Supplement: pnas.1808101115.sapp.pdf [file pnas.1808101115.sapp.pdf]

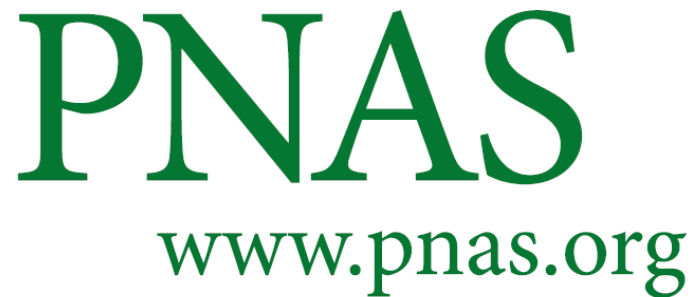

## Supplementary Information for

### **Insights into the origin of carbonaceous chondrite organics from their triple oxygen isotope composition**

R. Tartèse, M. Chaussidon, A. Gurenko, F. Delarue, F. Robert

Corresponding author: Romain Tartèse  
Email: [romain.tartese@manchester.ac.uk](mailto:romain.tartese@manchester.ac.uk)

#### **This PDF file includes:**

Figs. S1 to S3  
Tables S1 to S2

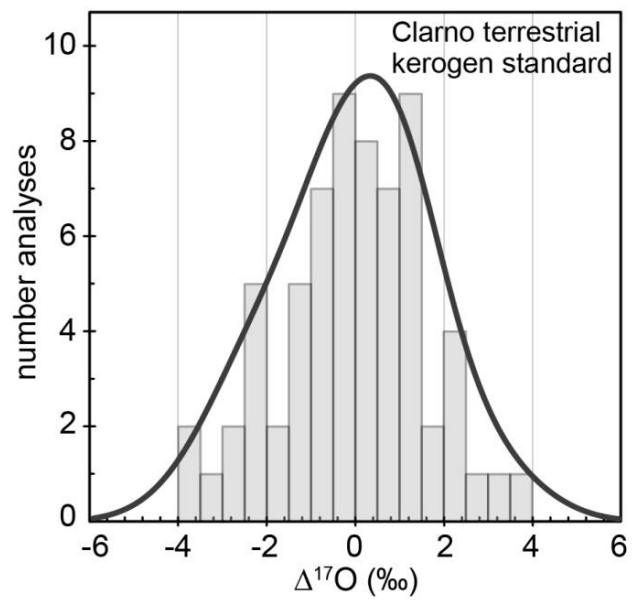

**Fig. S1.** Histogram and probability distribution of  $\Delta^{17}\text{O}$  values measured on the Clarno kerogen standard over all the L-SIMS analytical sessions.

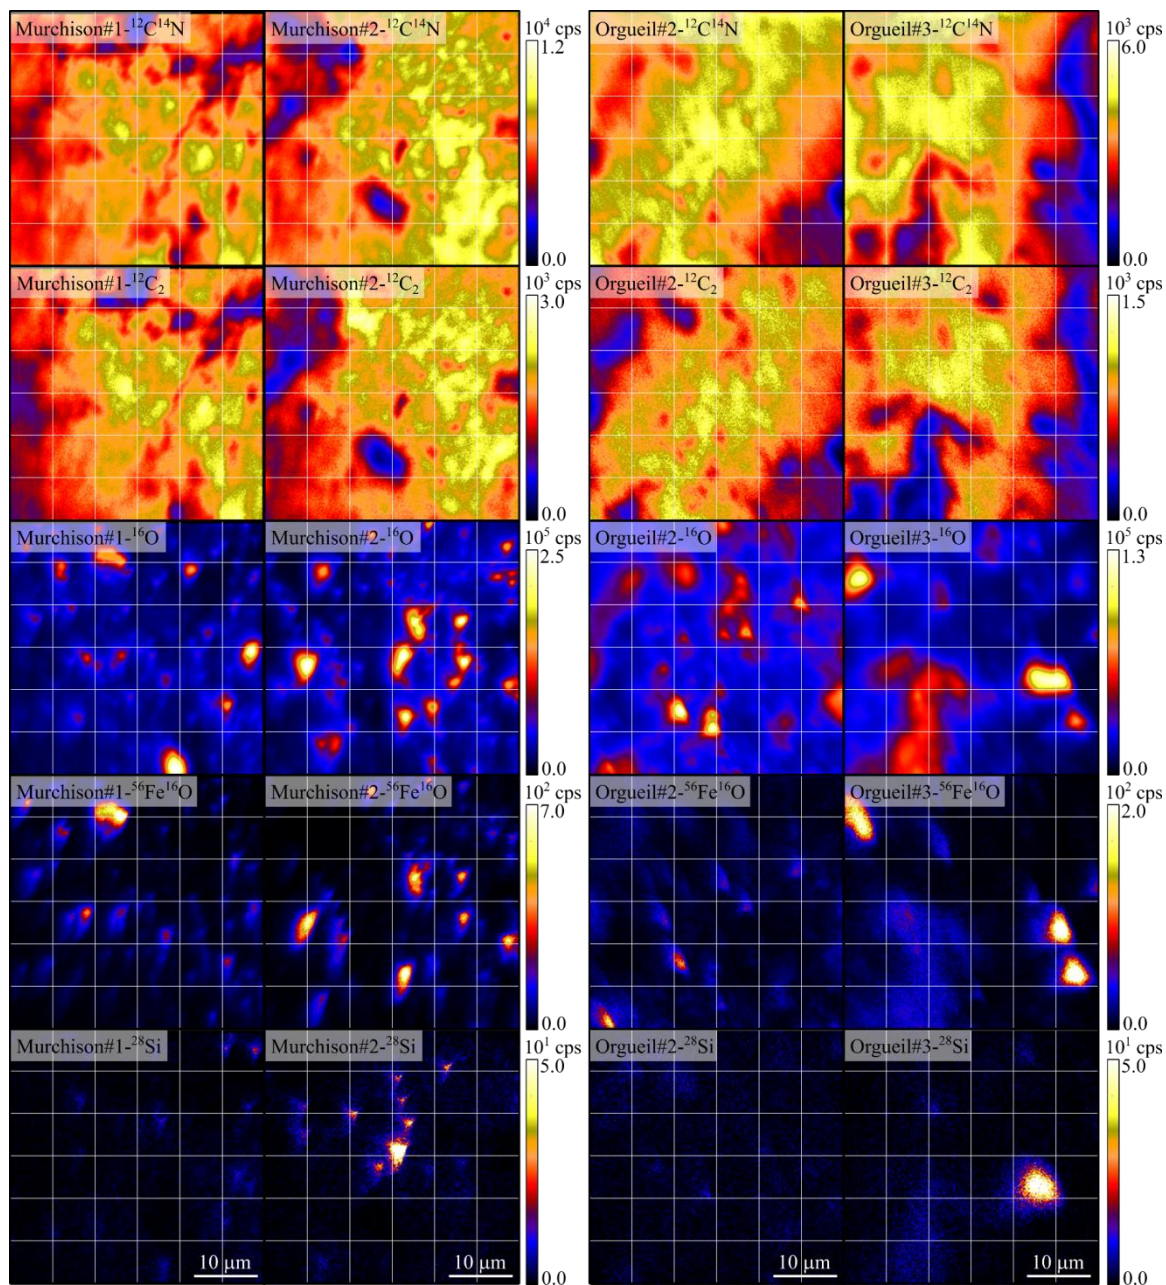

**Fig. S2.** NanoSIMS images obtained on  $40 \times 40 \mu\text{m}$  areas in Murchison and Orgueil IOM showing the distribution of  $^{12}\text{C}^{14}\text{N}$ ,  $^{12}\text{C}_2$ ,  $^{16}\text{O}$ ,  $^{56}\text{Fe}^{16}\text{O}$  and  $^{28}\text{Si}$  secondary ion species.

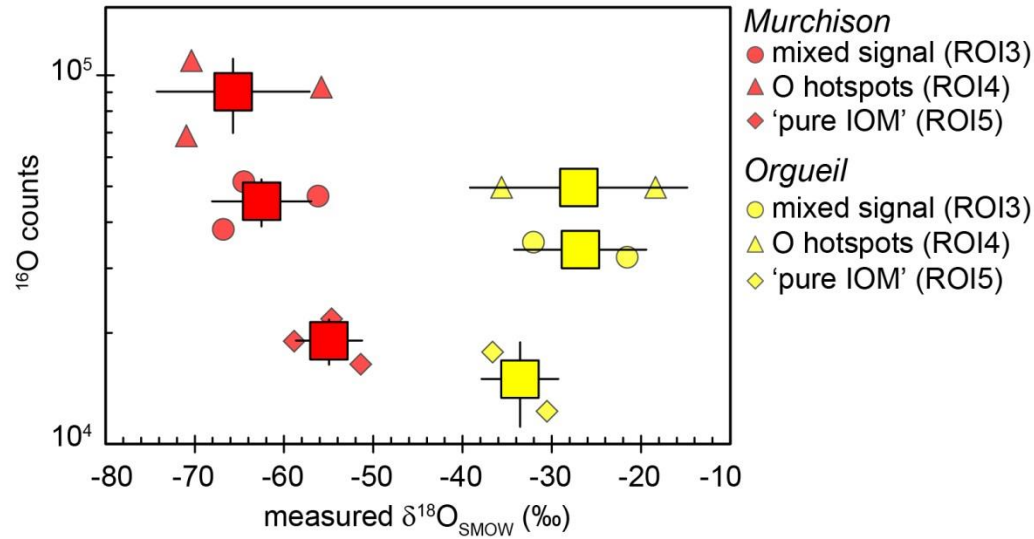

**Fig. S3.** Plot showing the NanoSIMS  $^{16}\text{O}$  intensity versus the measured  $\delta^{18}\text{O}$  values for regions of interest corresponding to areas with a mixture of IOM and O-rich residual minerals (ROI3), O-rich hotspots (ROI4), and 'pure IOM' areas (ROI5) for five areas analyzed in Murchison and Orgueil acid-residues.

**Table S1.** L-SIMS oxygen isotope results. \* Indicates the contribution of the  $^{16}\text{OH}^-$  peak tail on the measured  $^{17}\text{O}^-$  intensity.

| Analysis                  | Secondary ion intensity<br>(cps nA <sup>-1</sup> primary current) |                   |                   | $^{16}\text{OH}$<br>(‰)* | Isotope ratios (‰ vs. SMOW) |            |                       |            |                       |            |
|---------------------------|-------------------------------------------------------------------|-------------------|-------------------|--------------------------|-----------------------------|------------|-----------------------|------------|-----------------------|------------|
|                           | $^{16}\text{O}^-$                                                 | $^{17}\text{O}^-$ | $^{18}\text{O}^-$ |                          | $\delta^{18}\text{O}$       | 2 $\sigma$ | $\delta^{17}\text{O}$ | 2 $\sigma$ | $\Delta^{17}\text{O}$ | 2 $\sigma$ |
| <i>Orgueil IOM</i>        |                                                                   |                   |                   |                          |                             |            |                       |            |                       |            |
| Orgueil_3iso@4            | 3.80E+06                                                          | 1.40E+03          | 7.21E+03          | 1.7                      | -4.2                        | 2.9        | -6.2                  | 2.0        | -4.0                  | 2.3        |
| Orgueil_3iso@5            | 3.98E+06                                                          | 1.47E+03          | 7.57E+03          | 1.3                      | -1.6                        | 2.9        | -5.5                  | 1.9        | -4.7                  | 2.1        |
| Orgueil_3iso@7            | 4.07E+06                                                          | 1.50E+03          | 7.75E+03          | 0.8                      | 1.0                         | 2.9        | -6.9                  | 1.9        | -7.4                  | 1.9        |
| Orgueil@2                 | 3.02E+06                                                          | 1.13E+03          | 5.82E+03          | 2.4                      | 5.9                         | 2.3        | 2.3                   | 2.4        | -0.8                  | 2.2        |
| Orgueil@3                 | 2.56E+06                                                          | 9.59E+02          | 4.94E+03          | 2.3                      | 6.5                         | 2.3        | 3.1                   | 2.5        | -0.3                  | 2.5        |
| Orgueil@4                 | 2.33E+06                                                          | 8.72E+02          | 4.49E+03          | 2.3                      | 6.0                         | 2.3        | 2.8                   | 2.5        | -0.3                  | 2.5        |
| Orgueil@5                 | 6.27E+06                                                          | 2.37E+03          | 1.21E+04          | 1.5                      | 10.9                        | 2.3        | 10.5                  | 2.5        | 4.9                   | 2.4        |
| Orgueil@6                 | 7.54E+06                                                          | 2.87E+03          | 1.46E+04          | 1.5                      | 16.3                        | 2.3        | 18.9                  | 2.4        | 10.4                  | 2.2        |
| Orgueil@9                 | 4.10E+06                                                          | 1.55E+03          | 7.99E+03          | 2.2                      | 16.9                        | 2.3        | 15.2                  | 2.4        | 6.4                   | 2.3        |
| Orgueil@11                | 2.64E+06                                                          | 9.92E+02          | 5.12E+03          | 2.0                      | 11.8                        | 2.3        | 6.1                   | 2.5        | 0.0                   | 2.5        |
| Orgueil@12                | 4.28E+06                                                          | 1.59E+03          | 8.22E+03          | 1.3                      | 2.5                         | 2.3        | -4.2                  | 2.4        | -5.5                  | 2.2        |
| Orgueil@13                | 3.64E+06                                                          | 1.37E+03          | 7.03E+03          | 1.4                      | 8.2                         | 2.3        | 4.2                   | 2.4        | -0.1                  | 2.2        |
| Orgueil@16                | 2.44E+06                                                          | 9.12E+02          | 4.71E+03          | 1.8                      | 6.5                         | 2.3        | 0.3                   | 2.5        | -3.1                  | 2.4        |
| Orgueil@17                | 2.61E+06                                                          | 9.79E+02          | 5.08E+03          | 1.7                      | 15.2                        | 2.3        | 5.8                   | 2.4        | -2.1                  | 2.3        |
| Orgueil@19                | 1.50E+07                                                          | 5.57E+03          | 2.84E+04          | 2.1                      | 7.3                         | 2.3        | -2.0                  | 2.4        | -5.7                  | 2.3        |
| <i>Murchison IOM</i>      |                                                                   |                   |                   |                          |                             |            |                       |            |                       |            |
| Murchison_3iso@1          | 2.57E+07                                                          | 9.40E+03          | 4.71E+04          | 1.7                      | -6.5                        | 2.9        | -10.1                 | 1.9        | -6.7                  | 1.7        |
| Murchison_3iso@2          | 4.42E+07                                                          | 1.61E+04          | 8.14E+04          | 0.7                      | -7.5                        | 2.9        | -16.1                 | 1.9        | -12.2                 | 1.8        |
| Murchison_3iso@3          | 2.55E+07                                                          | 9.45E+03          | 4.81E+04          | 1.1                      | 1.9                         | 2.9        | -0.7                  | 1.9        | -1.7                  | 2.0        |
| Murchison_3iso@4          | 9.77E+06                                                          | 3.66E+03          | 1.86E+04          | 1.9                      | 7.4                         | 2.9        | 6.6                   | 1.9        | 2.7                   | 1.7        |
| Murchison_3iso@5          | 3.05E+07                                                          | 1.11E+04          | 5.53E+04          | 1.1                      | -13.4                       | 2.9        | -17.8                 | 1.9        | -10.9                 | 1.7        |
| Murchison_3iso@7          | 1.36E+07                                                          | 4.96E+03          | 2.51E+04          | 1.5                      | -14.4                       | 3.0        | -14.7                 | 2.0        | -7.2                  | 2.9        |
| Murchison_3iso@8          | 1.55E+07                                                          | 5.70E+03          | 2.89E+04          | 1.0                      | -4.6                        | 2.9        | -7.3                  | 1.9        | -4.9                  | 1.8        |
| Murchison@1               | 1.66E+07                                                          | 6.10E+03          | 3.10E+04          | 2.8                      | -4.7                        | 2.3        | -8.8                  | 2.4        | -6.3                  | 2.2        |
| Murchison@2               | 1.42E+07                                                          | 5.17E+03          | 2.64E+04          | 2.8                      | -18.0                       | 2.3        | -23.3                 | 2.4        | -14.0                 | 2.2        |
| Murchison@5               | 2.06E+07                                                          | 7.51E+03          | 3.82E+04          | 1.9                      | -11.8                       | 2.3        | -18.6                 | 2.4        | -12.5                 | 2.0        |
| Murchison@6               | 1.34E+07                                                          | 4.92E+03          | 2.52E+04          | 2.5                      | -9.3                        | 2.3        | -17.2                 | 2.4        | -12.4                 | 2.1        |
| Murchison@8               | 7.39E+06                                                          | 2.73E+03          | 1.40E+04          | 4.9                      | -10.3                       | 2.3        | -14.5                 | 2.5        | -9.1                  | 2.4        |
| Murchison@9               | 1.73E+07                                                          | 6.31E+03          | 3.21E+04          | 2.0                      | -14.3                       | 2.3        | -19.7                 | 2.4        | -12.2                 | 2.2        |
| <i>Cold Bokkeveld IOM</i> |                                                                   |                   |                   |                          |                             |            |                       |            |                       |            |
| CB_3iso@1                 | 1.41E+07                                                          | 5.12E+03          | 2.61E+04          | 1.5                      | -13.1                       | 2.9        | -19.8                 | 2.0        | -13.0                 | 2.3        |
| CB_3iso@2                 | 1.56E+07                                                          | 5.70E+03          | 2.90E+04          | 1.4                      | -9.4                        | 2.9        | -14.9                 | 2.0        | -10.0                 | 2.2        |
| CB_3iso@3                 | 1.11E+07                                                          | 4.07E+03          | 2.06E+04          | 1.6                      | -14.5                       | 2.9        | -8.8                  | 1.9        | -1.3                  | 2.0        |
| CB_3iso@4                 | 1.35E+07                                                          | 4.91E+03          | 2.52E+04          | 1.3                      | -10.9                       | 2.9        | -23.0                 | 1.9        | -17.3                 | 1.9        |
| CB_3iso@5                 | 1.20E+07                                                          | 4.42E+03          | 2.24E+04          | 1.3                      | -9.8                        | 2.9        | -10.9                 | 1.9        | -5.8                  | 1.7        |
| CB_3iso@6                 | 1.52E+07                                                          | 5.59E+03          | 2.83E+04          | 1.3                      | -5.9                        | 2.9        | -5.6                  | 1.9        | -2.5                  | 1.6        |
| CB_3iso@7                 | 8.59E+06                                                          | 3.16E+03          | 1.61E+04          | 1.8                      | -10.0                       | 2.9        | -12.1                 | 1.9        | -6.9                  | 1.9        |
| CB_3iso@8                 | 1.71E+07                                                          | 6.32E+03          | 3.19E+04          | 1.1                      | -5.2                        | 2.9        | -4.7                  | 1.9        | -2.0                  | 1.8        |

**Table S2.** NanoSIMS results obtained on Murchison and Orgueil acid-maceration residues.

| ROI                 | Area<br>( $\mu\text{m}^2$ ) | Intensity (cps) |                 |                 |                   |                              |                  |                               | Ratio (in ‰ vs. SMOW for $\delta^{17,18}\text{O}$ ) |           |                       |           |                                              |           |                                 |           | IMF corrected (‰)     |           |                       |           |
|---------------------|-----------------------------|-----------------|-----------------|-----------------|-------------------|------------------------------|------------------|-------------------------------|-----------------------------------------------------|-----------|-----------------------|-----------|----------------------------------------------|-----------|---------------------------------|-----------|-----------------------|-----------|-----------------------|-----------|
|                     |                             | $^{16}\text{O}$ | $^{17}\text{O}$ | $^{18}\text{O}$ | $^{12}\text{C}_2$ | $^{12}\text{C}^{14}\text{N}$ | $^{28}\text{Si}$ | $^{56}\text{Fe}^{16}\text{O}$ | $\delta^{18}\text{O}$                               | $1\sigma$ | $\delta^{17}\text{O}$ | $1\sigma$ | $^{12}\text{C}^{14}\text{N}/^{12}\text{C}_2$ | $1\sigma$ | $^{16}\text{O}/^{12}\text{C}_2$ | $1\sigma$ | $\delta^{18}\text{O}$ | $2\sigma$ | $\delta^{17}\text{O}$ | $2\sigma$ |
| <i>Murchison #1</i> |                             |                 |                 |                 |                   |                              |                  |                               |                                                     |           |                       |           |                                              |           |                                 |           |                       |           |                       |           |
| All area            | 1517                        | 31880           | 11.6            | 59.7            | 1607.5            | 6399.7                       | 0.9              | 36.0                          | -65.7                                               | 0.6       | -50.6                 | 1.5       | 3.88                                         | 0.04      | 19.8                            | 0.2       |                       |           |                       |           |
| Broad O rich        | 1091                        | 38251           | 13.9            | 71.6            | 1704.2            | 6710.0                       | 1.1              | 45.2                          | -66.8                                               | 0.7       | -51.7                 | 1.6       | 3.84                                         | 0.04      | 22.4                            | 0.3       |                       |           |                       |           |
| O hotspot           | 270                         | 68513           | 24.7            | 127.7           | 1591.3            | 6259.3                       | 1.1              | 94.6                          | -70.9                                               | 1.0       | -58.6                 | 2.3       | 3.84                                         | 0.04      | 43.0                            | 0.5       |                       |           |                       |           |
| 'pure' IOM          | 314                         | 18985           | 6.9             | 35.8            | 1736.2            | 6985.5                       | 0.9              | 14.5                          | -58.8                                               | 1.9       | -50.2                 | 4.4       | 3.92                                         | 0.04      | 10.8                            | 0.2       | -0.3                  | 11.7      | -8.1                  | 14.8      |
| <i>Murchison #2</i> |                             |                 |                 |                 |                   |                              |                  |                               |                                                     |           |                       |           |                                              |           |                                 |           |                       |           |                       |           |
| All area            | 1529                        | 39379           | 14.5            | 74.5            | 1669.1            | 7047.1                       | 1.8              | 40.7                          | -56.6                                               | 0.7       | -40.5                 | 1.7       | 4.10                                         | 0.05      | 23.1                            | 0.4       |                       |           |                       |           |
| Broad O rich        | 1191                        | 47012           | 17.2            | 89.0            | 1772.4            | 7463.7                       | 2.0              | 50.8                          | -56.2                                               | 0.8       | -40.7                 | 1.7       | 4.10                                         | 0.05      | 26.0                            | 0.4       |                       |           |                       |           |
| O hotspot           | 268                         | 92795           | 33.9            | 175.7           | 1688.2            | 7168.4                       | 3.1              | 123.6                         | -55.8                                               | 1.1       | -46.0                 | 2.6       | 4.14                                         | 0.04      | 52.9                            | 1.0       |                       |           |                       |           |
| 'pure' IOM          | 475                         | 21818           | 8.1             | 41.4            | 1833.6            | 7867.2                       | 1.3              | 15.9                          | -54.7                                               | 1.8       | -31.2                 | 4.1       | 4.17                                         | 0.05      | 11.6                            | 0.2       | 3.8                   | 11.7      | 10.9                  | 14.4      |
| <i>Murchison #3</i> |                             |                 |                 |                 |                   |                              |                  |                               |                                                     |           |                       |           |                                              |           |                                 |           |                       |           |                       |           |
| All area            | 1548                        | 38520           | 14.1            | 72.4            | 1550.8            | 7138.4                       | 1.0              | 23.8                          | -62.6                                               | 1.0       | -44.6                 | 1.7       | 4.44                                         | 0.06      | 24.7                            | 0.4       |                       |           |                       |           |
| Broad O rich        | 999                         | 51440           | 18.8            | 96.5            | 1622.3            | 7371.6                       | 1.1              | 32.2                          | -64.5                                               | 1.0       | -45.9                 | 1.9       | 4.39                                         | 0.05      | 31.6                            | 0.4       |                       |           |                       |           |
| O hotspot           | 249                         | 109608          | 39.7            | 204.4           | 1445.1            | 6530.8                       | 1.0              | 64.9                          | -70.4                                               | 1.5       | -53.0                 | 2.5       | 4.37                                         | 0.05      | 76.4                            | 0.7       |                       |           |                       |           |
| 'pure' IOM          | 400                         | 16439           | 6.1             | 31.3            | 1640.8            | 7863.2                       | 0.8              | 9.7                           | -51.4                                               | 2.2       | -36.7                 | 5.2       | 4.64                                         | 0.05      | 9.5                             | 0.2       | 7.1                   | 12.0      | 5.4                   | 15.8      |
| <i>Orgueil #3</i>   |                             |                 |                 |                 |                   |                              |                  |                               |                                                     |           |                       |           |                                              |           |                                 |           |                       |           |                       |           |
| All area            | 1548                        | 27211           | 10.1            | 52.8            | 816.5             | 3682.9                       | 1.3              | 9.8                           | -32.5                                               | 0.9       | -35.0                 | 2.0       | 4.27                                         | 0.07      | 33.2                            | 0.4       |                       |           |                       |           |
| Broad O rich        | 745                         | 35271           | 13.0            | 68.4            | 756.8             | 3574.5                       | 1.5              | 13.2                          | -32.1                                               | 1.1       | -34.2                 | 2.5       | 4.47                                         | 0.07      | 46.4                            | 0.6       |                       |           |                       |           |
| O hotspot           | 191                         | 49642           | 18.3            | 96.0            | 672.7             | 3345.4                       | 1.7              | 19.9                          | -35.6                                               | 1.8       | -44.4                 | 4.1       | 4.72                                         | 0.07      | 73.2                            | 1.1       |                       |           |                       |           |
| 'pure' IOM          | 314                         | 17747           | 6.6             | 34.3            | 946.2             | 4072.3                       | 1.1              | 5.4                           | -36.6                                               | 2.4       | -34.9                 | 5.6       | 4.08                                         | 0.07      | 18.6                            | 0.2       | 21.9                  | 12.2      | 7.2                   | 16.3      |
| <i>Orgueil #4</i>   |                             |                 |                 |                 |                   |                              |                  |                               |                                                     |           |                       |           |                                              |           |                                 |           |                       |           |                       |           |
| All area            | 1531                        | 23537           | 8.9             | 46.1            | 712.6             | 3273.8                       | 2.0              | 15.3                          | -22.8                                               | 1.0       | -12.3                 | 2.3       | 4.26                                         | 0.09      | 32.1                            | 0.6       |                       |           |                       |           |
| Broad O rich        | 901                         | 32093           | 12.2            | 62.9            | 661.0             | 3333.3                       | 2.9              | 23.1                          | -21.6                                               | 1.1       | -12.2                 | 2.5       | 4.65                                         | 0.11      | 48.0                            | 0.8       |                       |           |                       |           |
| O hotspot           | 323                         | 49644           | 18.9            | 97.8            | 465.2             | 2801.3                       | 5.4              | 42.5                          | -18.4                                               | 1.5       | -3.2                  | 3.5       | 5.53                                         | 0.13      | 106.5                           | 1.6       |                       |           |                       |           |
| 'pure' IOM          | 272                         | 12251           | 4.6             | 23.8            | 993.2             | 4146.7                       | 0.7              | 3.8                           | -30.5                                               | 3.3       | -19.5                 | 7.5       | 3.89                                         | 0.08      | 11.5                            | 0.3       | 28.0                  | 13.0      | 22.6                  | 19.2      |
